# Supplementary material
Source: PubMed Central journal article supplement (PMC7066699)

Supplemental Figures for:  
Anti-drug antibody formation in oncology: clinical relevance and challenges  
Jan Schellens et al.

### Supplemental Figures

**Figure 1A: PFS based on metformin usage**

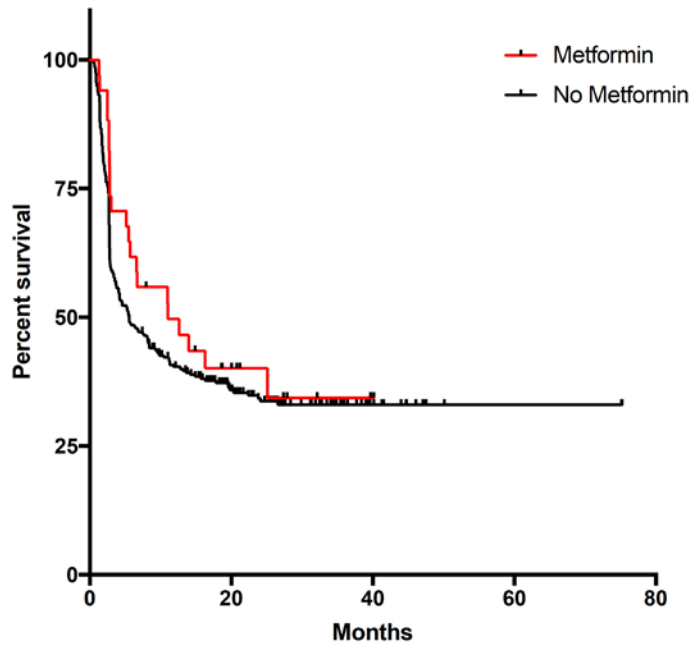

**Figure 1B: OS based on metformin usage**

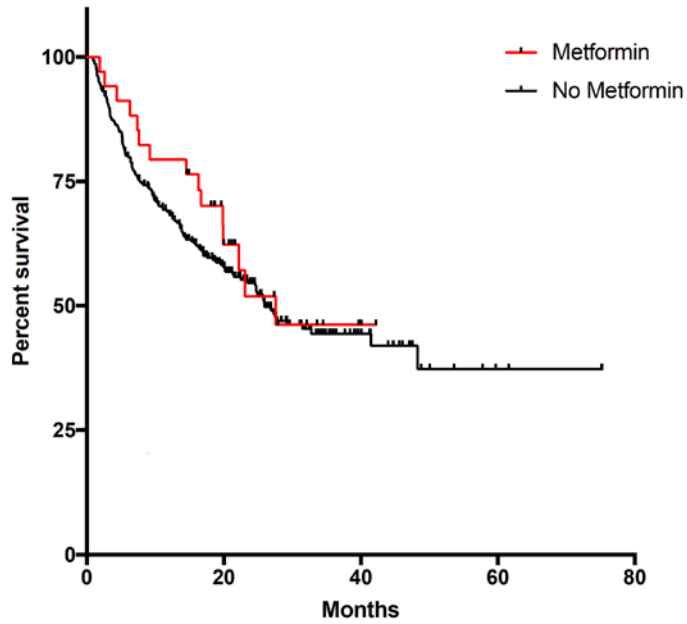

**Figure 2A: PFS based on beta-blocker usage**

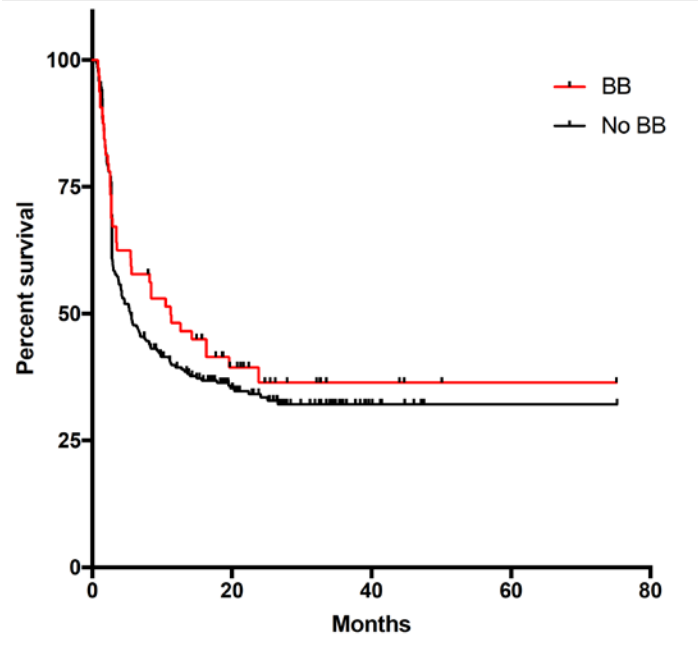

**Figure 2B: OS based on beta-blocker usage**

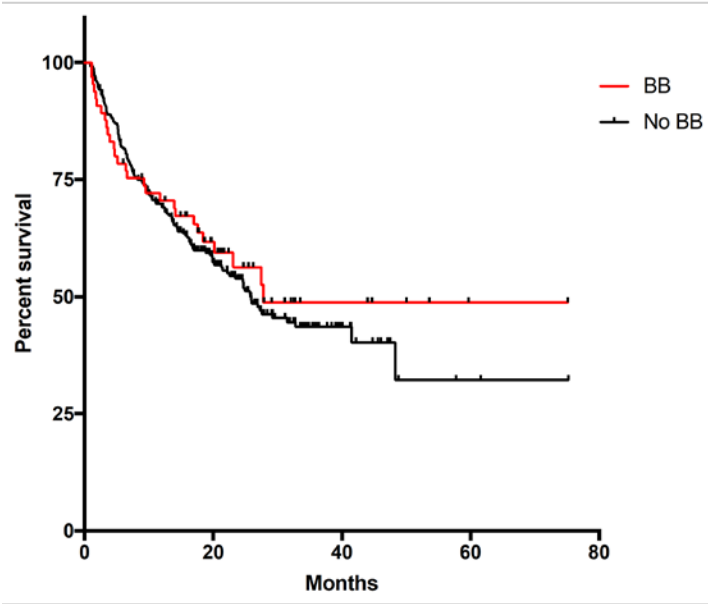

Supplement: ONCO-25-e602-s001.pdf [file ONCO-25-e602-s001.pdf]
